# Supplementary material for: Dual activation mode indanedione-based fluorometric probe for CN − sensing: application in bioimaging, fingerprint imaging, and food sample analysis
Source: Royal Society of Chemistry journal article supplement (doi:10.1039/d5nj00578g), 2025-01-01
Supplement: d5nj00578g1.pdf [file d5nj00578g1.pdf]

## Supporting Information

### **Dual Activation Mode Containing Indanedione Based Fluorometric Probe for $\text{CN}^-$ Sensing: Its Application in Bioimaging, Fingerprint and Food Sample Analysis**

Yesudhasan Chinnaraj<sup>a</sup>, Gouthaman Siddan<sup>b</sup>, Velmurugan Ajithkumar<sup>c</sup>, Perumal Varalakshmi<sup>c</sup>, Kumar Venkatesan<sup>d</sup>, Manickam Selvaraj<sup>e</sup> and Siva Ayyanar<sup>\*a</sup>

<sup>a</sup>Supramolecular and Organometallic Chemistry Laboratory, School of Chemistry, Madurai Kamaraj University, Madurai-21, Tamilnadu, India.

<sup>b</sup>Organic Material Lab, Indian Institute of Technology-Roorkee, India.

<sup>c</sup>Department of Molecular Microbiology, School of Biotechnology, Madurai Kamaraj University, Madurai-21, Tamilnadu, India.

<sup>d</sup>Department of Pharmaceutical Chemistry, College of Pharmacy, King Khalid University, Abha 61413, Saudi Arabia.

<sup>e</sup>Department of Chemistry, Faculty of Science, King Khalid University, Abha 61413, Saudi Arabia.

Corresponding author : E-mail: drasiva@gmail.com; siva.chem@mkuniversity.ac.in

| S. No | Table of contents                                                                                                                                                                                                                                              | Page. No |
|-------|----------------------------------------------------------------------------------------------------------------------------------------------------------------------------------------------------------------------------------------------------------------|----------|
| 1     | Materials and Methods                                                                                                                                                                                                                                          | 3-5      |
| 2     | <sup>1</sup> H NMR spectrum of <b>PBA</b> (Figure S1)                                                                                                                                                                                                          | 5        |
| 3     | <sup>13</sup> C NMR spectrum of <b>PBA</b> (Figure S2)                                                                                                                                                                                                         | 6        |
| 4     | <sup>1</sup> H NMR spectrum of <b>PBI</b> (Figure S3)                                                                                                                                                                                                          | 6        |
| 5     | <sup>13</sup> C NMR spectrum of <b>PBI</b> (Figure S4)                                                                                                                                                                                                         | 7        |
| 6     | HRMS spectrum of <b>PBI</b> (Figure S5)                                                                                                                                                                                                                        | 7        |
| 7     | absorption and emission spectra of <b>PBI</b> with various solvents (Figure S6)                                                                                                                                                                                | 8        |
| 8     | Quantum yield calculation of different solvents (Table. S1)                                                                                                                                                                                                    | 8        |
| 9     | Absorption, emission and stokes shift spectral data of various solvents (Table. S2)                                                                                                                                                                            | 8        |
| 10    | TD-DFT theoretical UV-vis spectrum of a) <b>PBI</b> and b) <b>PBI-CN</b> (Figure S7)                                                                                                                                                                           | 9        |
| 11    | HRMS spectrum of <b>PBI-CN</b> (Figure S8)                                                                                                                                                                                                                     | 9        |
|       | <sup>1</sup> H NMR Titration for <b>PBI</b> towards <b>CN<sup>-</sup></b> (Figure S9)                                                                                                                                                                          | 10       |
| 12    | Sensors for cyanide determination (Table S3)                                                                                                                                                                                                                   | 10       |
| 13    | Job's plot of <b>PBI</b> Vs. <b>CN<sup>-</sup></b> (Figure S10)                                                                                                                                                                                                | 11       |
| 14    | Time response <b>PBI</b> and <b>PBI-CN</b> (Figure S11)                                                                                                                                                                                                        | 11       |
| 15    | Ground state optimized structure of <b>PBI</b> and <b>PBI-CN</b> (Figure S12)                                                                                                                                                                                  | 12       |
| 16    | Molecular electrostatic potential map (MEP) (Figure S13)                                                                                                                                                                                                       | 12       |
| 17    | Time-correlated single photon counting spectrometer for probe <b>PBI</b> and <b>PBI-CN</b> (Table S4)                                                                                                                                                          | 12       |
| 18    | Analytical Performance of the Proposed Method for food Samples (Table S5)                                                                                                                                                                                      | 12       |
| 19    | Analytical Performance of the Proposed Method for Water Samples (Table S6)                                                                                                                                                                                     | 13       |
| 20    | The fluorescence spectra of <b>PBI</b> in the presence of cyanide-containing extracts from (a) sprouted potatoes, (b) bitter almonds, (c) cassava tubers, and (d) apple seeds (Figure S14)                                                                     | 13       |
| 21    | Emission spectra of probe <b>PBI</b> were recorded in the presence of varying concentrations of real water samples, including (a) Madurai groundwater, (b) Thamirabarani river water, and (c) Ramnad seawater (Tamil Nadu) in DMSO solvent system (Figure S15) | 14       |
| 22    | MTT assay of <b>PBI</b> on HEK293T Cell line (24 h) (Figure S16)                                                                                                                                                                                               | 15       |
| 23    | (a) Emission spectrum of <b>PBI</b> various ratio of DMSO: H <sub>2</sub> O (b) Various Ratios of DMSO and Water (Figure S17)                                                                                                                                  | 15       |
| 24    | pH study of <b>PBI</b> and <b>PBI-CN</b> (Figure S18)                                                                                                                                                                                                          | 16       |

## 1. Materials and Methods

### 1.1 Instrumentations

A Bruker spectrometer (400 MHz) was used to obtain the Nuclear Magnetic Resonance (NMR) spectra; chemical shift values were recorded in  $\delta$  (delta) (parts per million). Electrospray Ionization Mass Spectrometry (ESI-MS) analyses were recorded in LC/Q -TOF, Agilent Instruments Limited, United States. ESI-MS was measured in positive ion mode. The collision and ionization voltage were  $-70$  kV and  $-4.5$  kV, respectively, using nitrogen as atomization and desolvation gas. The desolvation temperature was set at  $300$  °C. The relative amount of each part was determined from the LC-MS chromatogram using the area normalization method, which ensured a thorough analysis. The optical properties of the prepared materials were examined on a JASCO V-630 UV-vis spectrophotometer using the quartz cuvette with a  $1$  cm path length at  $298$  K. The excitation and emission slits were set to  $2.5$  nm for all the emission measurements. The steady-state photoluminescence (PL) emission spectra of synthesized dyes were analysed on JASCO F-8500 fluorescence spectrophotometer, Fluoromax spectrofluorometer (HORIBA) and Radical Inverted Medical Biological Microscope RTC-7.

### 1.2. Stock solution of PBI and anions

The PBI stock solution in DMSO was prepared at a concentration of  $0.001$  M to conduct naked-eye sensing and photophysical studies. The stock solutions of competitive anions  $\text{CN}^-$ ,  $\text{CO}_3^{2-}$ ,  $\text{SO}_3^{2-}$ ,  $\text{SO}_4^{2-}$ ,  $\text{NO}_2^-$ ,  $\text{NO}_3^-$ ,  $\text{I}^-$ ,  $\text{Br}^-$ ,  $\text{H}_3\text{PO}_4^{2-}$ , and  $\text{SCN}^-$  were made by dissolving appropriate amounts of their tetra butylammonium salts in HPLC grade water. UV-vis absorption and emission titration experiments were conducted with  $20$   $\mu\text{M}$  probe **PBI** against  $20 \times 10^{-2}$  mM of various anions at  $25$  °C, following a thorough and well-designed experimental plan.

### 1.3. The determination of the detection limit

Emission spectral data of PBI confirmed the detection limits (DL) upon the gradual addition of  $\text{CN}^-$ .

$$\text{DL} = 3 \sigma / S \text{ and LOQ: } 10 \sigma / S$$

where  $\sigma$  was the standard deviation of a blank sample, and  $S$  represented the absolute value of the slope between fluorescence intensity and  $\text{CN}^-$  concentration.

#### 1.4. Job's plot and the stern-Volmer quenching efficiency.

The Job's plot method was performed as follows: A stock solution of the probe and a stock solution of tetra butyl ammonium cyanide were prepared at the same concentration in DMSO and water. The quenching efficiency can be estimated by the Stern-Volmer equation  $F_0/F = 1 + K_{SV}[Q]$ , where  $F_0$  is the fluorescence intensity before the addition of anion,  $F$  is the fluorescence intensity after the addition of anion, and  $[Q]$  is the concentration of anion.<sup>43</sup>

#### 1.5. Theoretical calculation

The molecular electrostatic potential, bond lengths, and angles were calculated using DFT. Moreover, the optimized geometries of **PBI**, **PBI-CN**, and the HOMO-LUMO energy gap for PTI and its complexes were calculated using density functional theory (DFT) with Gaussian 09 W. The DFT-based B3LYP/6-311G\* model was performed for C, O, and H atoms. The molecular interaction between **PBI** and  $CN^-$  was thoroughly analysed and proposed in the DFT calculation results, ensuring a comprehensive system understanding.

#### 1.6. Paper strip analysis

After submerging in the probe **PBI** (20  $\mu$ M) solution in DMSO solvent, a Whatman paper was allowed to air dry at room temperature. A digital camera documented the colour variations on the probe **PBI** coated paper strip after further investigation with  $CN^-$ .

#### 1.7. Latent finger print analysis

The visualization of latent fingerprints was carried out using a powder dusting technique with a fine fluorescent powder. A minimal quantity of PBI fine powder was gently applied to the target surface, ensuring uniform coverage, and allowed to adhere for approximately 5 seconds. Following this, the excess powder was carefully removed using a non-contact method to avoid frictional interaction with the latent fingerprint residue, thereby preserving its structural integrity. The developed fingerprints were then analyzed under appropriate fluorescence excitation conditions to assess the effectiveness of the visualization technique.

## 1.8. Bioimaging application

The fluorescence intensity of the prob **PBI** inside the cells has been assessed via the model organism *Caenorhabditis elegans*, a significant step in understanding this process. This simple and transparent nematode worm with a short lifecycle and a constant number of somatic cells after adulthood was the perfect candidate for this study. We followed the standard protocol for worm culture and maintenance, ensuring the reliability of results.<sup>44</sup> The day-1 adult worms were exposed to an S-complete medium including *E. Coli* OP50 and PBI (20 and 50  $\mu$ M) in 96 well plates and allowed 2 hr in the medium at 20 °C. The addition of  $CN^-$  (10  $\mu$ M) has been done in part of the worms separated from the 96 well plates. The worms were fixed in agarose pads with or without sodium azide and anesthesia for microscopic imaging. The fluorescence imaging has been performed in an Olympus BX41 fluorescence microscope through a 450-480 exciter filter (Blue light) and emission filter 515-550 nm (Green light emission). The fluorescence images of worms were captured and adopted with an Olympus OMD camera with 8f/s without exposure, and the fluorescence intensity of each worm was analyzed via ImageJ software. Statistical analysis was performed using SPSS software and represented SEM and \* $p > 0.05$ , which were considered significantly different.

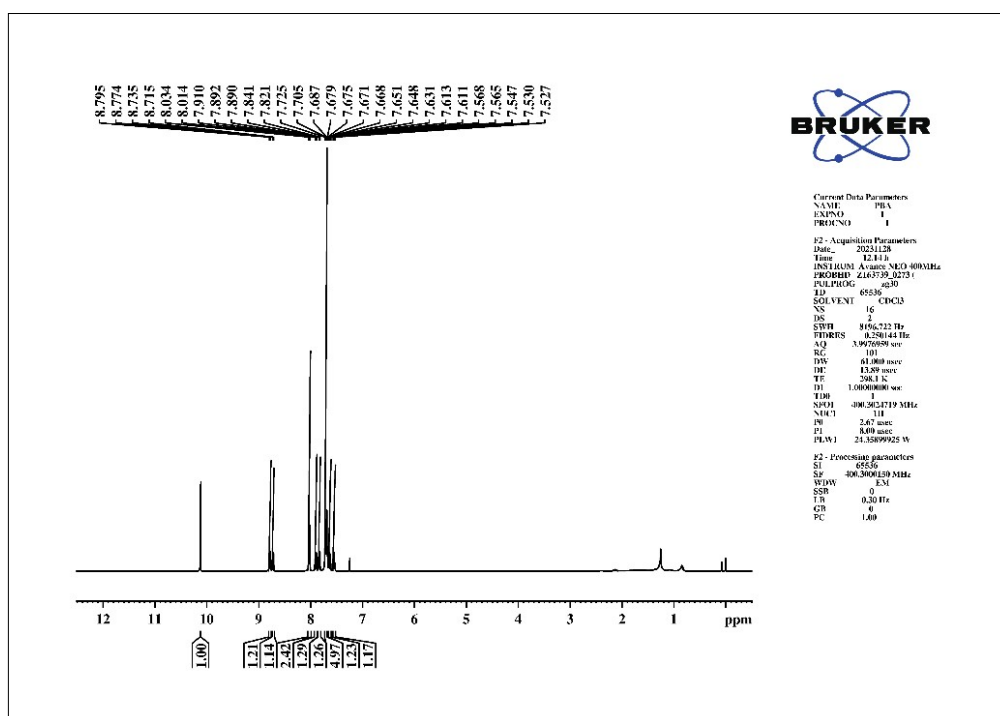

**Figure: S1.**  $^1\text{H}$  NMR spectrum of **PBA** in  $\text{CDCl}_3$

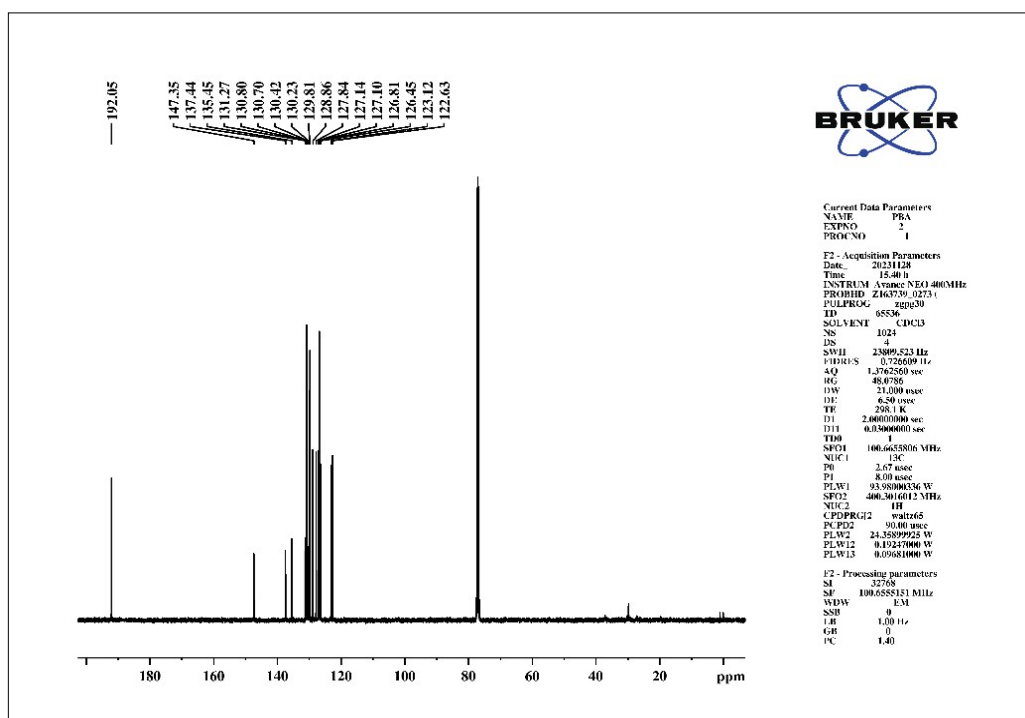

**Figure: S2.**  $^{13}\text{C}$  NMR spectrum of PBA in  $\text{CDCl}_3$

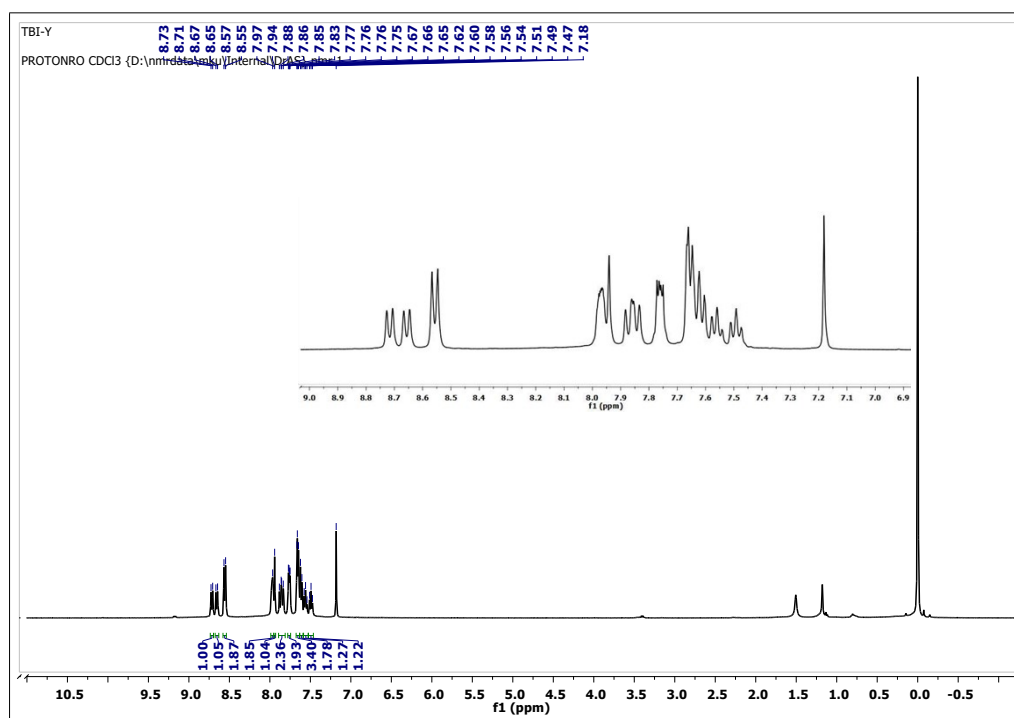

**Figure: S3.**  $^1\text{H}$  NMR spectrum of PBI in  $\text{CDCl}_3$

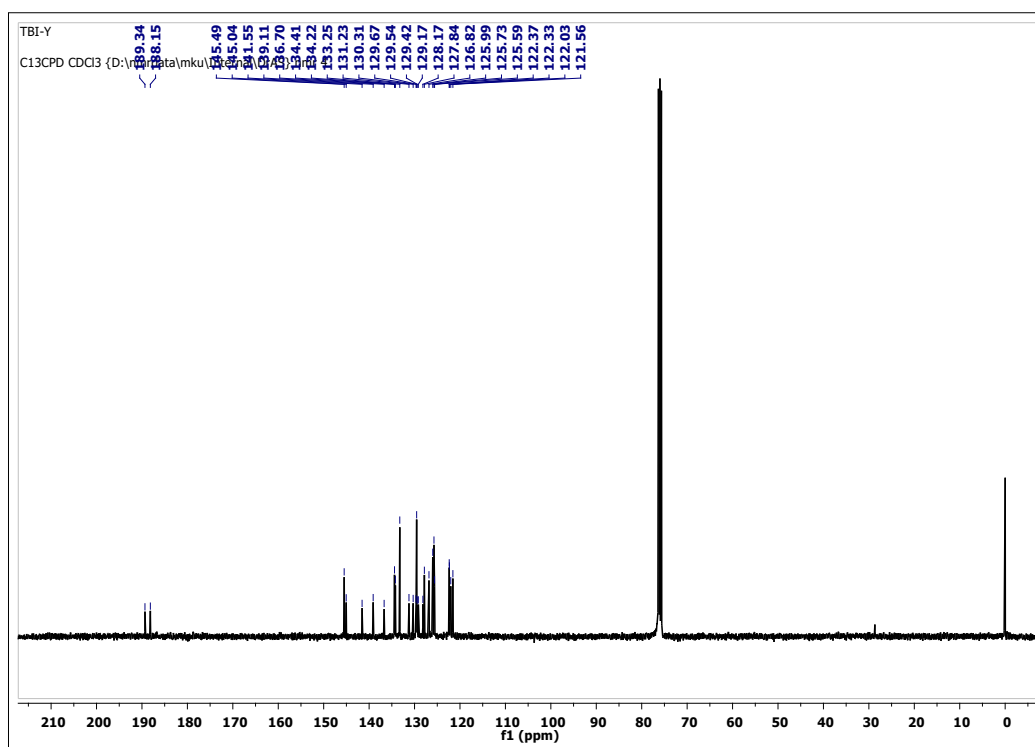

Figure: S4.  $^{13}\text{C}$  NMR spectrum of PBI in  $\text{CDCl}_3$

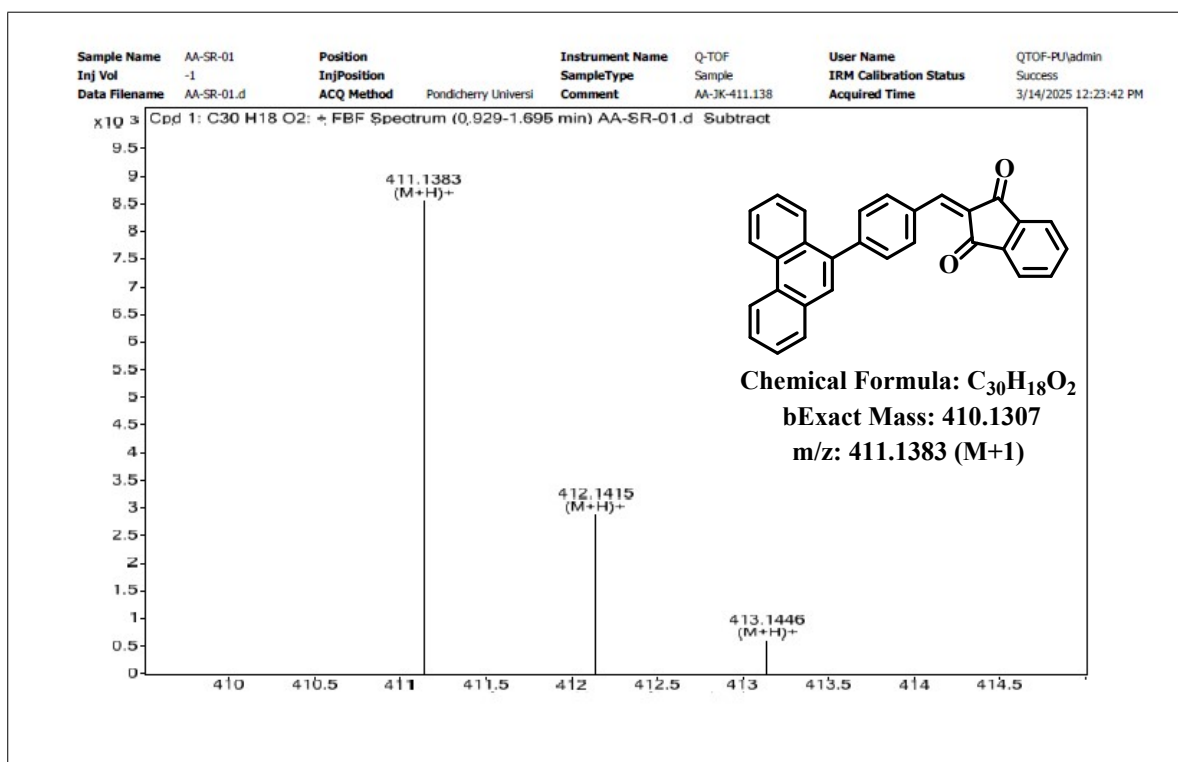

Figure: S5. HRMS spectrum of PBI

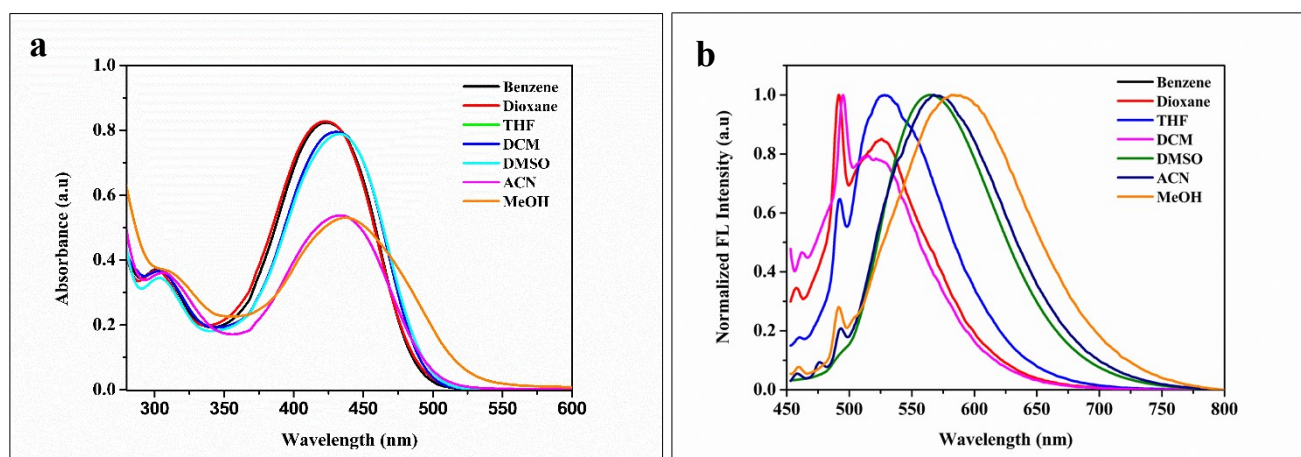

**Figure: S6** a) absorption spectra of **PBI** and b) emission spectra of **PBI** with various solvents

**Table: S1** Quantum yield calculation of different solvents

| Entry | solvents           | Quantum yield<br>$\Phi_S$ (%) |
|-------|--------------------|-------------------------------|
| 1     | Benzene            | 8.25                          |
| 2     | Dioxane            | 8.24                          |
| 3     | THF                | 7.11                          |
| 4     | Dichloromethane    | 5.40                          |
| 5     | Dimethyl sulfoxide | 4.08                          |
| 6     | Acetonitrile       | 3.10                          |
| 7     | Methanol           | 2.85                          |

**Table: S2** Absorption, emission and stokes shift spectral data of various solvents

| Solvent        | $\lambda_{ab}$ , (nm) | $\lambda_{emi}$ , (nm) | Stokes shift ( $\text{cm}^{-1}$ ) |
|----------------|-----------------------|------------------------|-----------------------------------|
| <b>Benzene</b> | 422                   | 526                    | 4685                              |
| <b>Dioxane</b> | 424                   | 531                    | 4752                              |
| <b>THF</b>     | 425                   | 533                    | 4767                              |
| <b>DCM</b>     | 430                   | 543                    | 4839                              |
| <b>DMSO</b>    | 431                   | 567                    | 4873                              |
| <b>ACN</b>     | 432                   | 572                    | 5565                              |
| <b>MeOH</b>    | 437                   | 587                    | 5847                              |



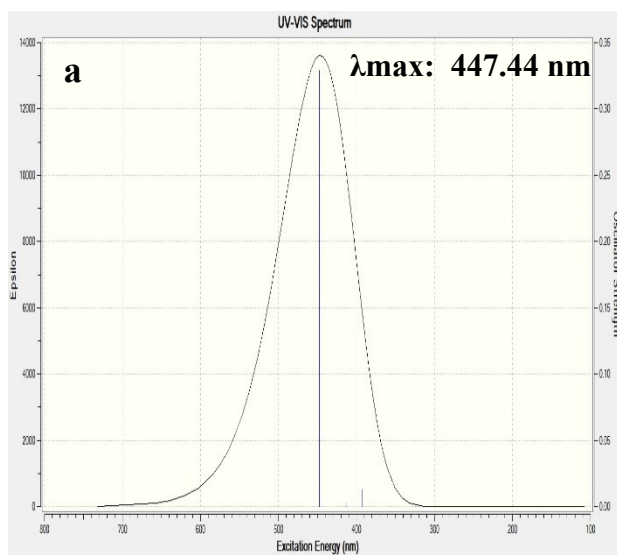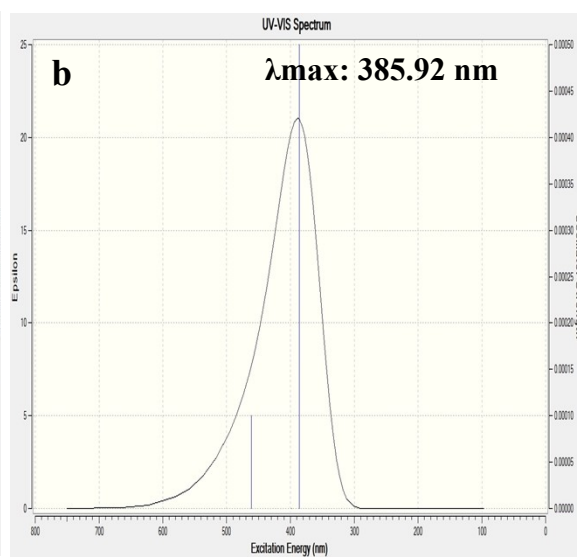

**Figure: S7.** TD-DFT theoretical UV-vis spectrum of a) PBI and b) PBI-CN

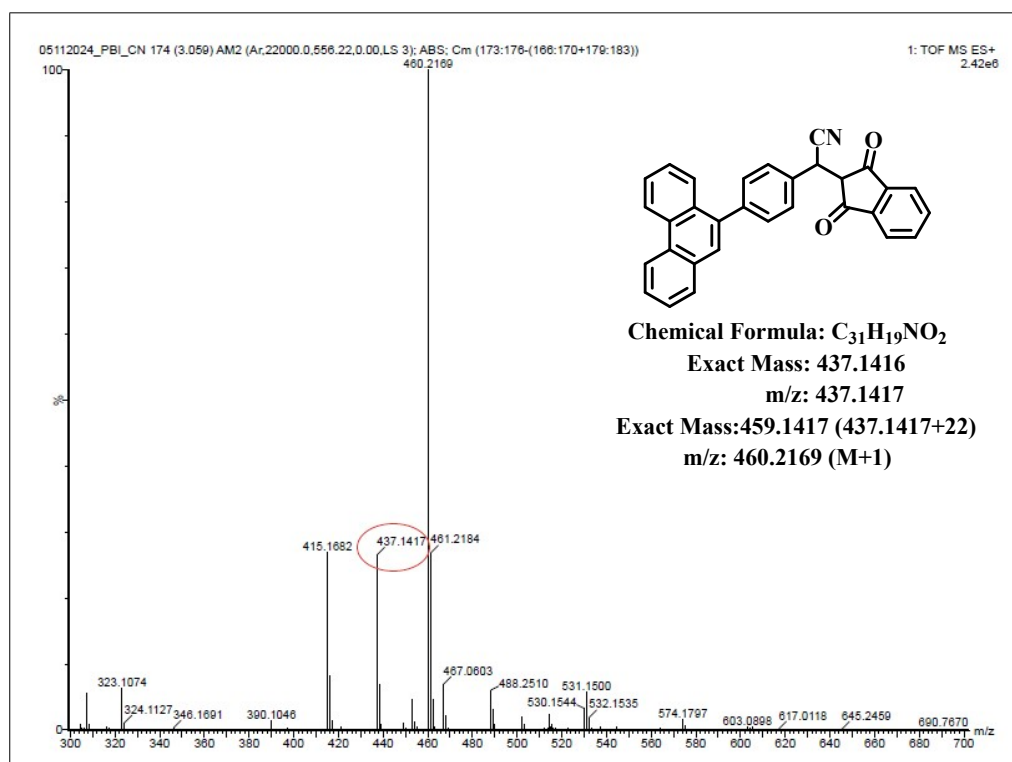

**Figure: S8.** HRMS spectrum of PBI-CN

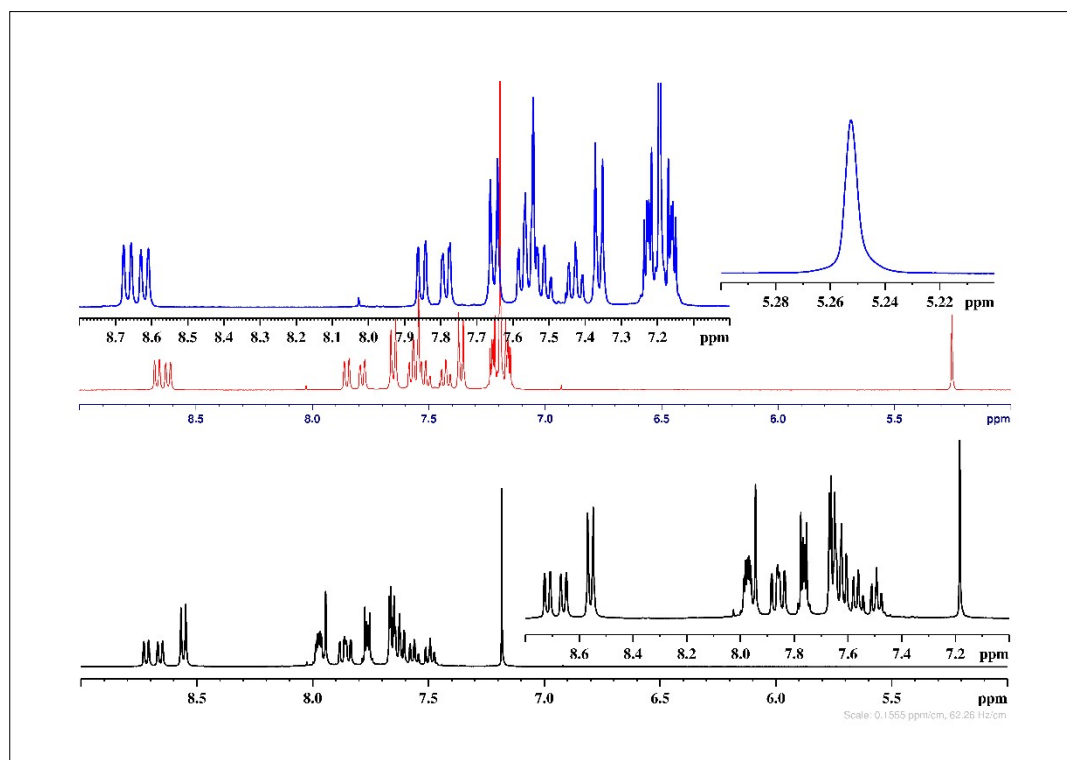

**Figure S9.**  $^1\text{H}$  NMR Titration for PBI towards  $\text{CN}^-$

**Table: S3.** Sensors for cyanide determination

| S.NO | Sensors                               | LOD (M)                      | Reference |
|------|---------------------------------------|------------------------------|-----------|
| 1    | Coumarinyl-Benzothiazolyl Schiff base | $0.75\ \mu\text{M}$          | 10        |
| 2    | Bdiketone difluoroboron based         | $2.23\ \mu\text{M}$          | 13        |
| 3    | Benzothiazole-phenylenediacetonitrile | $0.62\ \mu\text{M}$          | 17        |
| 4    | Indandione based                      | $6.2 \times 10^{-7}\text{M}$ | 21        |
| 5    | Porphyrin based                       | $6.2 \times 10^{-7}\text{M}$ | 25        |
| 6    | Naphthalene diimide based             | $4.1 \times 10^{-7}\text{M}$ | 28        |
| 7    | Indanedione based                     | $9.4 \times 10^{-7}\text{M}$ | 30        |
| 8    | Present work                          | $0.107\ \mu\text{M}$         |           |

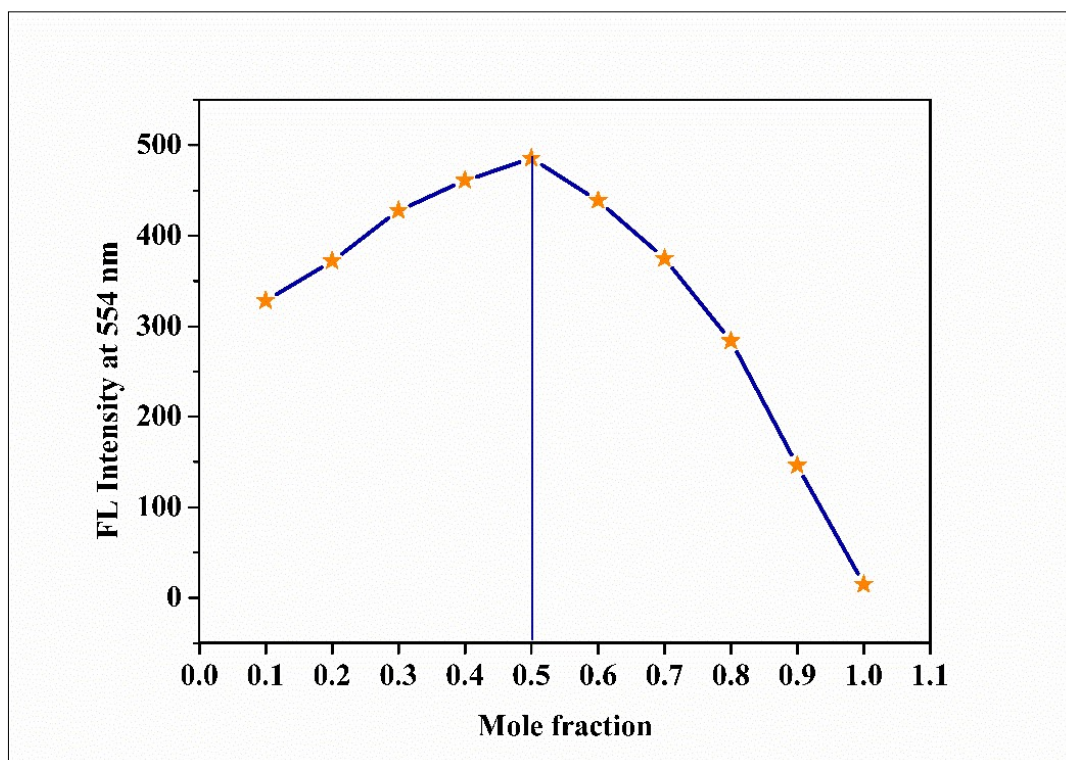

**Figure S10.** The Job's plot for **PBI** towards  $\text{CN}^-$  in the DMSO solution

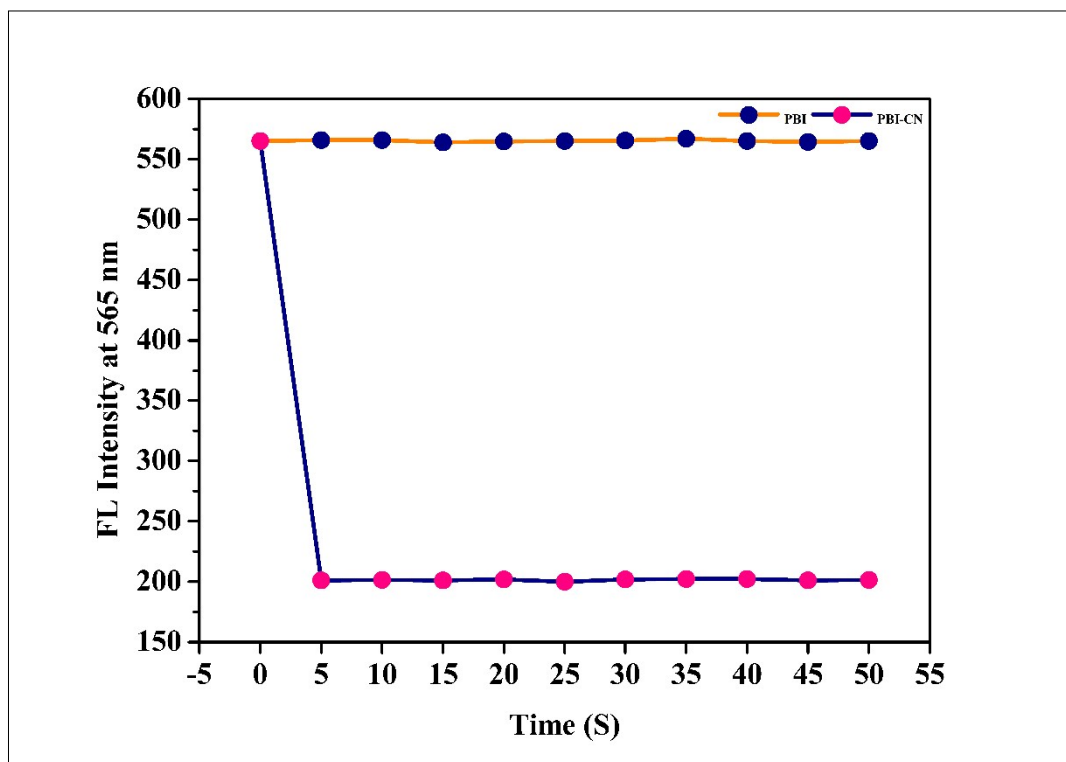

**Figure: S11.** Time response **PBI** and **PBI-CN**

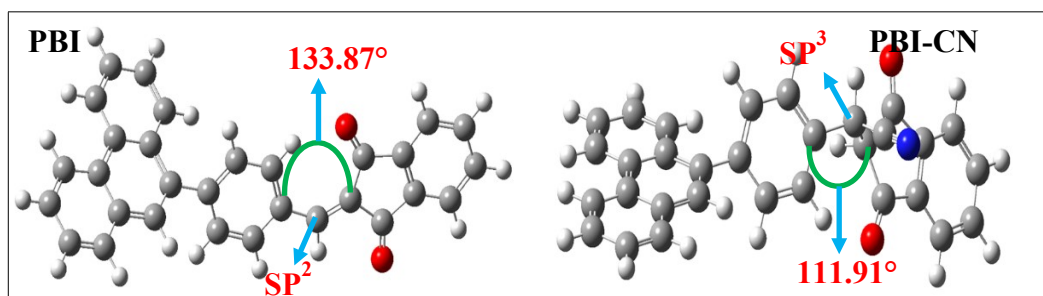

**Figure: S12.** Ground state optimized structure of **PBI** and **PBI -CN**

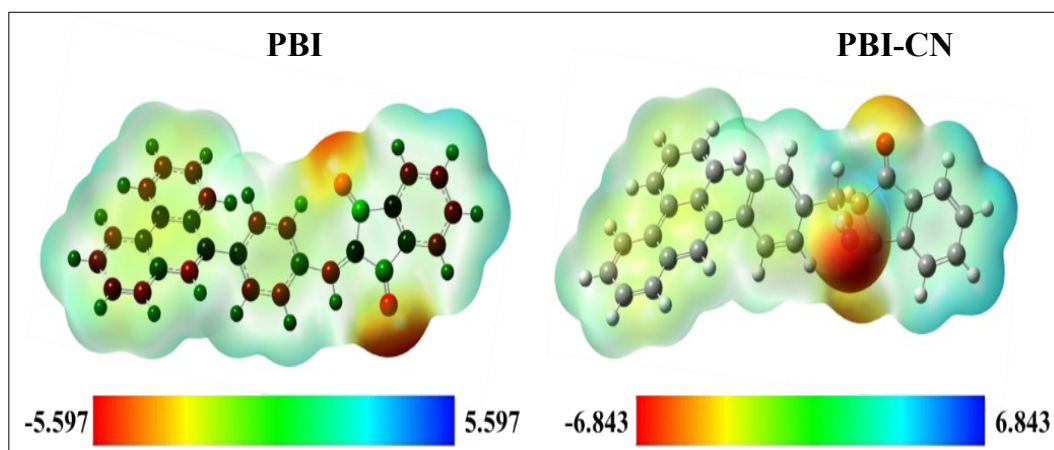

**Figure: S13.** Molecular electrostatic potential map (MEP)

**Table: S4** Fluorescence Lifetime Parameters of compound **PBI** and **PBI-CN**

| System        | $\lambda_{\text{ex}}$<br>(nm) | $\lambda_{\text{em}}$<br>(nm) | $\tau_1$ (ns)<br>(Rel %) | $\tau_2$ (ns)<br>(Rel %) | $\tau_3$ (ns)<br>(Rel %) | $\tau$<br>Average<br>(ns) | $\chi^2$ |
|---------------|-------------------------------|-------------------------------|--------------------------|--------------------------|--------------------------|---------------------------|----------|
| <b>PBI</b>    | 430                           | 565                           | 0.11                     | 6.23                     | 0.11                     | 0.12                      | 1.15     |
| <b>PBI-CN</b> | 440                           | 565                           | 1.82                     | 6.16                     | 0.09                     | 5.27                      | 1.06     |

| Sample                   | Added<br>( $\mu\text{ mol L}^{-1}$ ) | Detected<br>( $\mu\text{ mol L}^{-1}$ ) | Recovery<br>(n=3, %) | RSD<br>(n=3, %) |
|--------------------------|--------------------------------------|-----------------------------------------|----------------------|-----------------|
| <b>sprouted potatoes</b> | 20                                   | 19.98                                   | 99.93                | 1.24            |
| <b>bitter almonds</b>    | 20                                   | 19.87                                   | 99.35                | 0.95            |
| <b>cassava tubers</b>    | 20                                   | 19.99                                   | 99.95                | 3.00            |
| <b>apple seeds</b>       | 20                                   | 19.99                                   | 99.95                | 10.85           |

**Table: S5.** Analytical Performance of the Proposed Method for food Samples

**Table: S6.** Analytical Performance of the Proposed Method for Water Samples

| Sample                                           | Added<br>( $\mu\text{ mol L}^{-1}$ ) | Detected<br>( $\mu\text{ mol L}^{-1}$ ) | Recovery<br>(n=3, %) | RSD<br>(n=3, %) |
|--------------------------------------------------|--------------------------------------|-----------------------------------------|----------------------|-----------------|
| <b>Madurai Groundwater<br/>Tamil Nadu, India</b> | 2                                    | 2.0047                                  | 100.23               | 3.40            |
|                                                  | 4                                    | 4.0047                                  | 100.11               | 2.70            |
|                                                  | 6                                    | 6.0015                                  | 100.02               | 2.18            |

|                                                      |   |        |        |      |
|------------------------------------------------------|---|--------|--------|------|
| <b>Thamirabarani river water. Tamil Nadu, India.</b> | 2 | 2.0015 | 100.07 | 2.31 |
|                                                      | 4 | 4.0015 | 100.03 | 4.09 |
|                                                      | 6 | 6.0015 | 100.02 | 1.29 |
| <b>Ramnad seawater Tamil Nadu, India</b>             | 2 | 2.0015 | 100.07 | 0.34 |
|                                                      | 4 | 4.0047 | 100.11 | 0.94 |
|                                                      | 6 | 5.9984 | 99.97  | 1.13 |

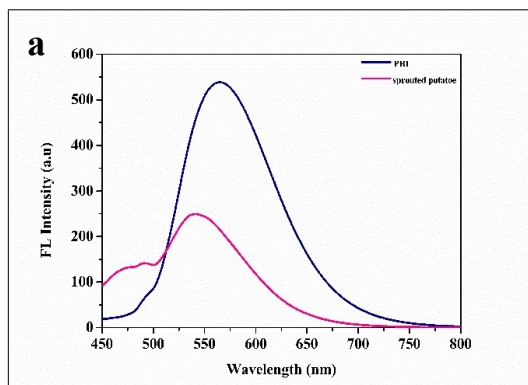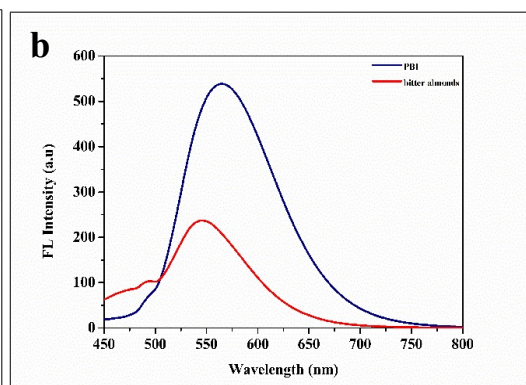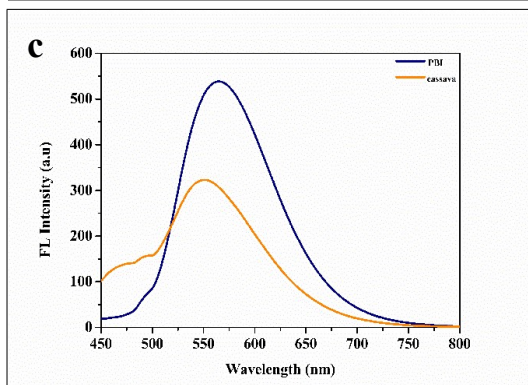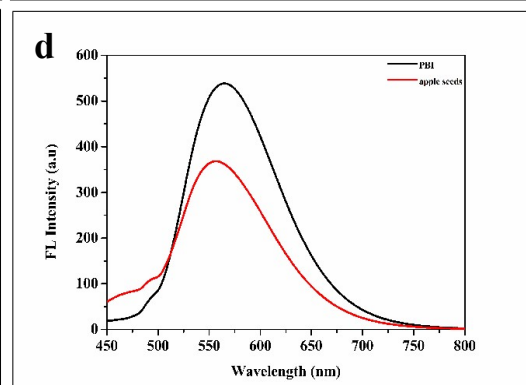

**Figure: S14.** The fluorescence spectra of PBI in the presence of cyanide-containing extracts from (a) sprouted potatoes, (b) bitter almonds, (c) cassava tubers, and (d) apple seeds.

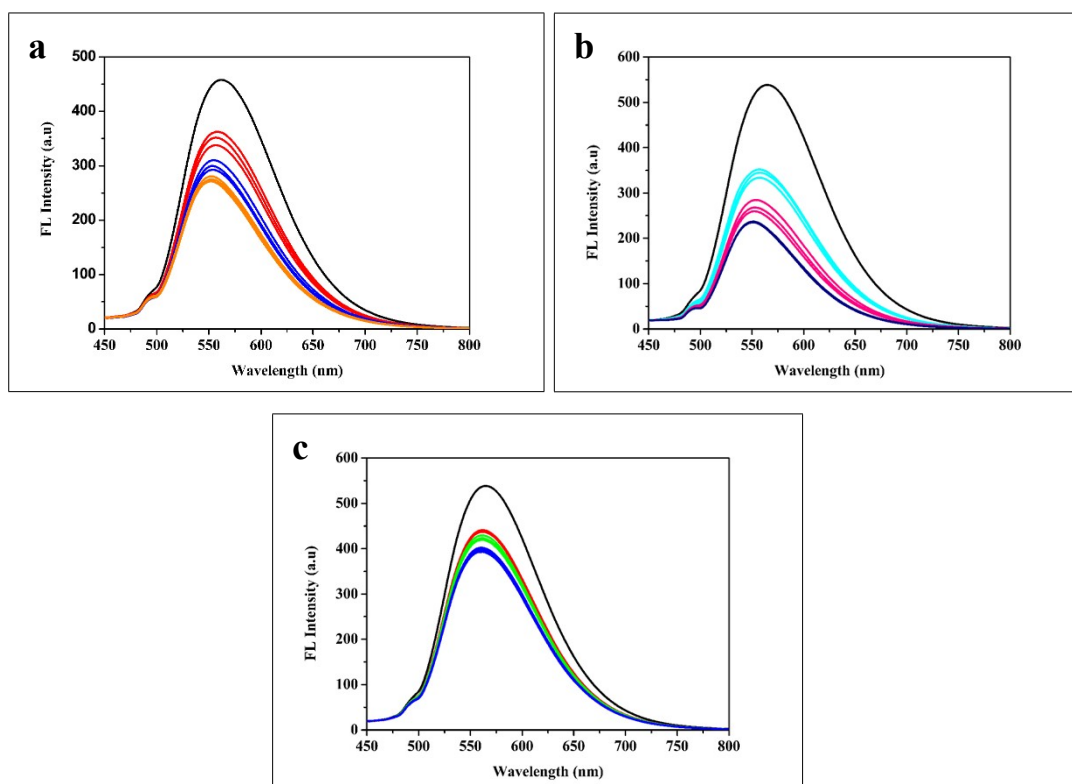

**Figure: S15.** Emission spectra of probe **PBI** were recorded in the presence of varying concentrations of real water samples, including (a) Madurai groundwater, (b) Thamirabarani river water, and (c) Ramnad seawater (Tamil Nadu, India) in DMSO solvent system.

| PBI<br>( $\mu\text{g/mL}$ ) | Cell viability<br>(%) | SD   |
|-----------------------------|-----------------------|------|
| Control                     | 100                   | 4.27 |
| 20                          | 78.52                 | 4.33 |
| 40                          | 55.61                 | 5.84 |
| 60                          | 48.26                 | 9.77 |
| 80                          | 37.47                 | 7.20 |
| 100                         | 35.90                 | 1.10 |

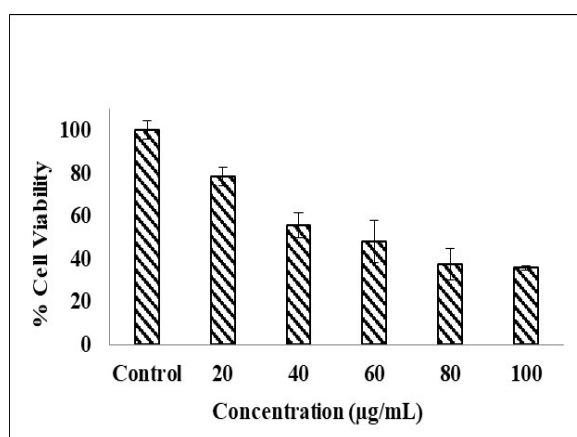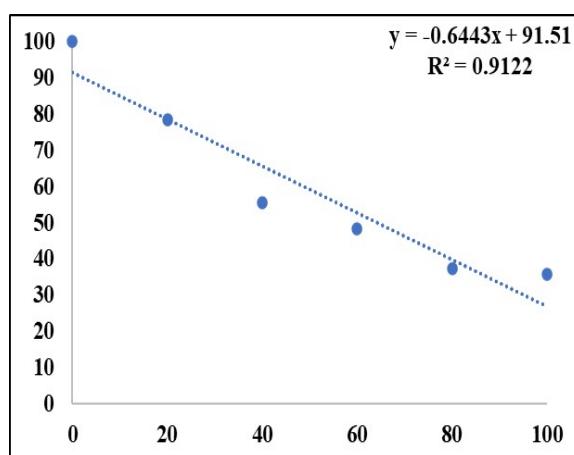



**Figure: S16** MTT assay of **PBI** on HEK293T Cell line (24 h)

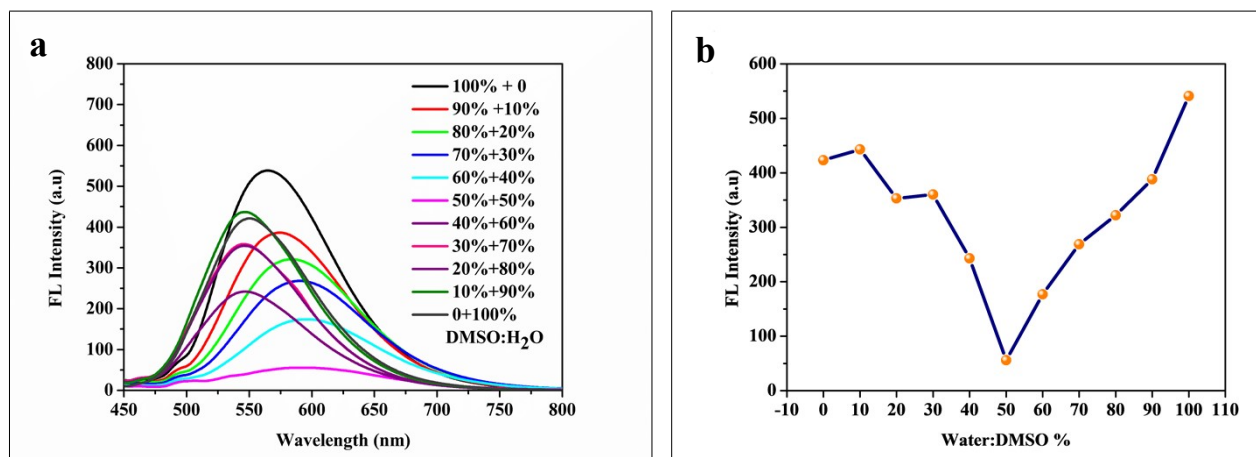

Figure: S17 (a) Emission spectrum of PBI various ratio of DMSO: H<sub>2</sub>O (b) Various Ratios of DMSO and Water

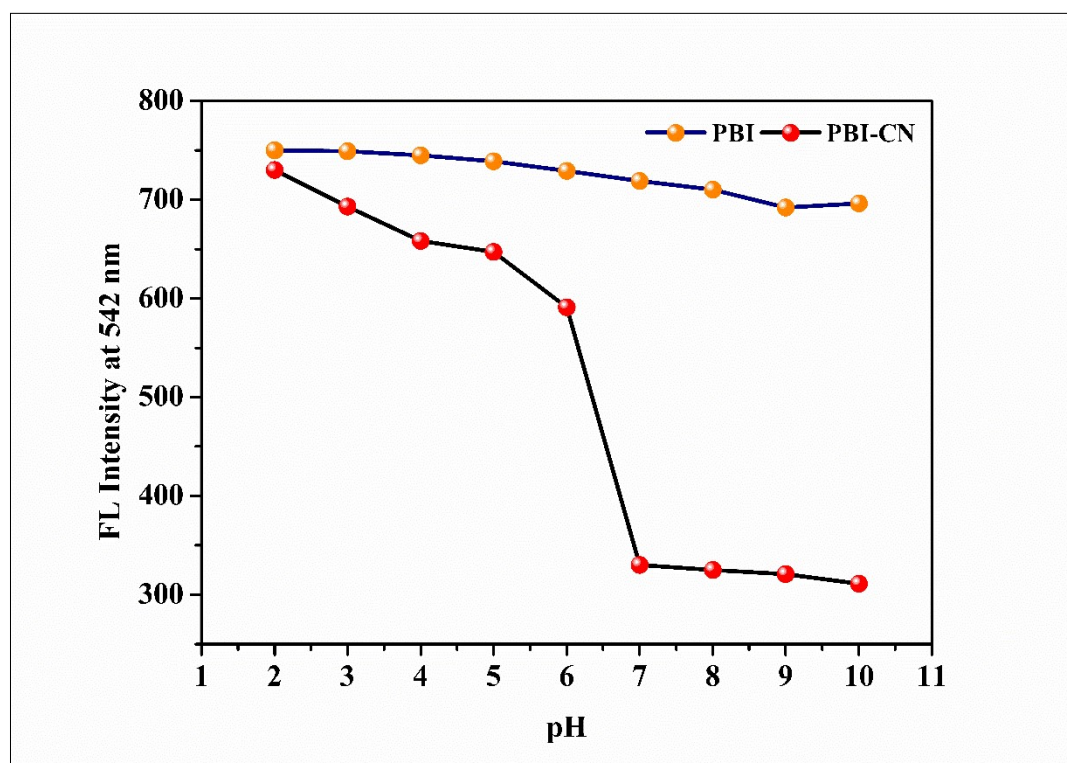

**Figure: S18** pH study of PBI and PBI-CN

## Reference

- S1 S. Huanhuan, D. Weiwei, L. Chunxia, L. Zhanxian, Z. Hongyan, W. Liuhe, Y. Mingming, *Sensors and Actuators B: Chemical*, 2018, **273**, 927-934.
- S2 S. Alam, A.S. Sohail, Y.A.A. Abdullah, Zulfiqar Ali Khan, Y. Muhammad, R. Waqar, *Spectrochim. Acta Part A: Molecular and Biomolecular Spectroscopy* 2025, **327**, 125414.
- S3 O. Mehmet, E Serkan, M. Sait, *Analytica Chimica Acta*, 2022, **1227**, 340320.
- S4 Z. Fang, Z. Rong, L. Xiaozhong, G. Kunpeng, H. Zhaoxiang, L. Xiaoqing, X. Jingjuan, L. Jie, L. Da, T. Xia, *Dyes and Pigments*, 2018, **155**, 225–232.
- S5 T. Jiaqi, W. Yijia, M. Ju, W. Jian, Q. Anjun, Z.S. Jing, Z.T. Ben, *Chemistry A European journal*, 2014, **16** (20), 4661-4670.
